# Supplementary material
Source: PubMed Central journal article supplement (PMC4604392)

**Supplementary Material For:**

## **HIV Drug Resistance Testing by High-Multiplex “Wide” Sequencing on the Illumina MiSeq**

H Lapointe<sup>a</sup>, W Dong<sup>a</sup>, GQ Lee<sup>a</sup>, DR Bangsberg<sup>b,c,d</sup>, JN Martin<sup>e</sup>, AR Mocello<sup>e</sup>, Y Boum<sup>d</sup>, A Karakas<sup>a</sup>, D Kirkby<sup>a</sup>, AFY Poon<sup>a,f</sup>, PR Harrigan<sup>a,f</sup>, CJ Brumme<sup>a</sup>

- a. BC Centre for Excellence in HIV/AIDS, Vancouver, Canada
- b. Harvard School of Public Health, Boston, MA, USA
- c. Massachusetts General Hospital, Boston, MA, USA
- d. Mbarara University of Science of Technology, Mbarara, Uganda
- e. University of California, San Francisco, CA, USA
- f. University of British Columbia, Vancouver, Canada

**Corresponding Author:**

Chanson Brumme  
BC Centre for Excellence in HIV/AIDS  
680-1081 Burrard St.  
Vancouver, BC Canada, V6Z 1Y6  
Phone: (604) 682-2344 ext 63211  
FAX: (604) 806-9463  
e-mail: [cbrumme@cfenet.ubc.ca](mailto:cbrumme@cfenet.ubc.ca)

**Co-Corresponding Author:**

Richard Harrigan  
Director, Research Labs  
BC Centre for Excellence in HIV/AIDS  
680-1081 Burrard St.  
Vancouver BC Canada V6Z 1Y6  
Phone: (604) 806-8281  
FAX: (604) 806-8464  
e-mail: [prharrigan@cfenet.ubc.ca](mailto:prharrigan@cfenet.ubc.ca)

**Table S1: Reverse Transcription and PCR Amplification Primers for MiSeq and Sanger Sequencing of HIV Reverse Transcriptase**

| Samples                   | Primer    | Step | Direction | HXB2 Location | Sequence (5' to 3')                                            |
|---------------------------|-----------|------|-----------|---------------|----------------------------------------------------------------|
| Canadian-Primary (Sanger) | RT3.1     | RT   | R         | 3830-3859     | GCTCCTACTATGGGTTCTTTCTCTAACTGG                                 |
|                           | 5CP1      | PCR1 | F         | 1981-2008     | GAAGGGCACACAGCCAGAAATTGCAGGG                                   |
|                           | 2.5       | PCR2 | F         | 2011-2039     | CCTAGGAAAAAGGGCTGTTGGAAATGTGG                                  |
|                           | RT3798R   | PCR2 | R         | 3777-3798     | CAAACCTCCCACTCAGGAATCCA                                        |
| Canadian-Backup (Sanger)  | RT3361R   | RT   | R         | 3342-3361     | TAAATCTGACTTGCCCAATT                                           |
|                           | PRTO5     | PCR1 | F         | 2008-2031     | GCCCCTAGGAAAAAGGGCTGTTGG                                       |
|                           | 2.5       | PCR2 | F         | 2011-2039     | CCTAGGAAAAAGGGCTGTTGGAAATGTGG                                  |
|                           | NE1.1     | PCR2 | R         | 3303-3323     | CTGTATGTCATTGACAGTCCA                                          |
| UARTO (Sanger)            | RTR2      | RT   | R         | 3303-3322     | TGTATRTCATTGACAGTCCA                                           |
|                           | CP2F      | PCR1 | F         | 2610-2635     | GTAAACAATGGCCATTGACAGAAGA                                      |
|                           | RTF2wd    | PCR2 | F         | 2629-2651     | CAGAAGARAAAATAAAAGCATTAA                                       |
|                           | RT3271R   | PCR2 | R         | 3252-3271     | ACTGTCCATTTRTCAGGATG                                           |
| MiSeq                     | ILRT2796F | PCR2 | F         | 2796 - 2815   | <b>TCGTCGGCAGCGTCAGATGTGTATAAGAGACAG</b> AGAACTCAAGACTTYTGGGA  |
|                           | ILRT3271R | PCR2 | R         | 3252-3271     | <b>GTCTCGTGGGCTCGGAGATGTGTATAAGAGACAG</b> ACTGTCCATTTRTCAGGATG |

Amplicons generated for Sanger sequencing differed depending on sample source and in the event of PCR failures during initial amplifications. All amplicons were produced by two-step RT-PCR followed by nested PCR amplification (PCR2). Canadian samples were processed by BCCfE clinical staff to generate a contiguous amplicon spanning the entire protease and RT codons 1-400 (Canadian-Primary). A subset of samples had failed a previous amplification attempt and were thus amplified using a ‘backup’ set of primers to obtain an amplicon spanning protease and RT codons 1-240 (Canadian-Backup). Ugandan samples were all amplified using a single primer set to span RT 35-234 (UARTO). MiSeq amplicons were generated from first-round Sanger products using primers containing Illumina-specific adaptor sequences (bolded bases).

**Table S2: Index Sequences for 1152-Fold Multiplex MiSeq Sequencing**

| <b>Tag</b> | <b>Read</b> | <b>Index Sequence (5' to 3')</b> |
|------------|-------------|----------------------------------|
| I521       | I1          | ACGAGTGC                         |
| I522       | I1          | ACGCTCGA                         |
| I523       | I1          | AGACGCAC                         |
| I524       | I1          | AGCACTGT                         |
| I525       | I1          | ATCAGACA                         |
| I526       | I1          | ATATCGCG                         |
| I527       | I1          | CGTGTCTC                         |
| I528       | I1          | CTCGCGTG                         |
| I541       | I1          | TCTCTATG                         |
| I542       | I1          | TGATACGT                         |
| I543       | I1          | CATAGTAG                         |
| I544       | I1          | CGAGAGAT                         |
| I545       | I1          | ATACGACG                         |
| I546       | I1          | TCACGTAC                         |
| I547       | I1          | CGTCTAGT                         |
| I548       | I1          | TCTACGTA                         |
| N501       | I1          | TAGATCGC                         |
| N502       | I1          | CTCTCTAT                         |
| N503       | I1          | TATCCTCT                         |
| N504       | I1          | AGAGTAGA                         |
| N505       | I1          | GTAAGGAG                         |
| N506       | I1          | ACTGCATA                         |
| N507       | I1          | AAGGAGTA                         |
| N508       | I1          | CTAAGCCT                         |
| I731       | I2          | GTAGTACA                         |
| I732       | I2          | GTAGTCGT                         |
| I733       | I2          | AGTCTACG                         |
| I734       | I2          | TACTCGTA                         |
| I735       | I2          | CGAGAGTA                         |
| I736       | I2          | CGTCTCTA                         |

| <b>Tag</b> | <b>Read</b> | <b>Index Sequence (5' to 3')</b> |
|------------|-------------|----------------------------------|
| I737       | I2          | AGCGACGA                         |
| I738       | I2          | GCGTATGT                         |
| I739       | I2          | ACTCGCGT                         |
| I740       | I2          | ATAGTAGT                         |
| I741       | I2          | TGTACAGT                         |
| I742       | I2          | TATAGTCT                         |
| I751       | I2          | ACGACGCT                         |
| I752       | I2          | AGCGTACT                         |
| I753       | I2          | TACTCTAT                         |
| I754       | I2          | GTAGCGTG                         |
| I755       | I2          | GTCTACTG                         |
| I756       | I2          | TCACGTCCG                        |
| I757       | I2          | TGTGTGTA                         |
| I758       | I2          | CACGTGTA                         |
| I759       | I2          | GATCTGTA                         |
| I760       | I2          | ACAGCGTA                         |
| I761       | I2          | CTACACTA                         |
| I762       | I2          | GTGATCGA                         |
| I771       | I2          | TAGTGCGA                         |
| I772       | I2          | TCGCTAGA                         |
| I773       | I2          | AGTATAGA                         |
| I774       | I2          | ATACGTCA                         |
| I775       | I2          | TACTCACA                         |
| I776       | I2          | TATACTGT                         |
| I777       | I2          | GATCGCGT                         |
| I778       | I2          | CTGCTAGT                         |
| I779       | I2          | CGTGAGCT                         |
| I780       | I2          | TGTATACT                         |
| I781       | I2          | TCTCGACT                         |
| I782       | I2          | GTAGCACT                         |
| N701       | I2          | TAAGGCGA                         |

| <b>Tag</b> | <b>Read</b> | <b>Index Sequence (5' to 3')</b> |
|------------|-------------|----------------------------------|
| N702       | I2          | CGTACTAG                         |
| N703       | I2          | AGGCAGAA                         |
| N704       | I2          | TCCTGAGC                         |
| N705       | I2          | GGACTCCT                         |
| N706       | I2          | TAGGCATG                         |
| N707       | I2          | CTCTCTAC                         |
| N708       | I2          | CAGAGAGG                         |
| N709       | I2          | GCTACGCT                         |
| N710       | I2          | CGAGGCTG                         |
| N711       | I2          | AAGAGGCA                         |
| N712       | I2          | GTAGAGGA                         |

A short-cycle, indexed PCR enables unique tagging of all amplicons for MiSeq sequencing. The dual-indexing strategy using 24 “forward” (I1) and 48 “reverse” (I2) indices allows barcoding up to 1152 samples for a single MiSeq run.

**Table S3: Distribution HIV Subtypes Successfully Sequenced**

| <b>Subtype</b> | <b>Both Methods</b> | <b>Sanger Only</b> | <b>MiSeq Only</b> |
|----------------|---------------------|--------------------|-------------------|
| A1             | 164 (19.7%)         | 10 (20.4%)         | 10 (16.7%)        |
| B              | 458 (55%)           | 27 (55.1%)         | 28 (46.7%)        |
| C              | 62 (7.5%)           | 1 (2%)             | 7 (11.7%)         |
| D              | 100 (12%)           | 7 (14.3%)          | 10 (16.7%)        |
| G              | 9 (1.1%)            | 0 (0%)             | 1 (1.7%)          |
| H              | 4 (0.5%)            | 0 (0%)             | 0 (0%)            |
| AE             | 12 (1.4%)           | 1 (2%)             | 0 (0%)            |
| Recombinant    | 6 (0.7%)            | 1 (2%)             | 0 (0%)            |
| Undetermined   | 17 (2%)             | 2 (4.1%)           | 4 (6.7%)          |

HIV subtyping was performed using RIP using a 90% confidence threshold and a 200-bp window size (<http://www.hiv.lanl.gov/content/sequence/RIP/RIP.html>)

**Table S4: Prevalence of NNRTI and NRTI Drug Resistance Mutations Detected by MiSeq and Sanger Sequencing**

| Drug Class | Codon | Amino Acid | Canada (n=546)     |                     |           | UARTO (n=286)      |                     |           |
|------------|-------|------------|--------------------|---------------------|-----------|--------------------|---------------------|-----------|
|            |       |            | MiSeq (5% Mixture) | MiSeq (20% Mixture) | Sanger    | MiSeq (5% Mixture) | MiSeq (20% Mixture) | Sanger    |
| NNRTI      | 100   | I          | 0 (0%)             | 0 (0%)              | 0 (0%)    | 0 (0%)             | 0 (0%)              | 0 (0%)    |
| NNRTI      | 101   | E          | 9 (1.6%)           | 6 (1.1%)            | 7 (1.3%)  | 3 (0.5%)           | 3 (0.5%)            | 3 (0.5%)  |
| NNRTI      | 101   | H          | 0 (0%)             | 0 (0%)              | 0 (0%)    | 0 (0%)             | 0 (0%)              | 0 (0%)    |
| NNRTI      | 101   | P          | 1 (0.2%)           | 1 (0.2%)            | 1 (0.2%)  | 0 (0%)             | 0 (0%)              | 0 (0%)    |
| NNRTI      | 103   | N          | 48 (8.8%)          | 39 (7.1%)           | 39 (7.1%) | 1 (0.2%)           | 1 (0.2%)            | 1 (0.2%)  |
| NNRTI      | 106   | A          | 1 (0.2%)           | 1 (0.2%)            | 1 (0.2%)  | 0 (0%)             | 0 (0%)              | 0 (0%)    |
| NNRTI      | 106   | M          | 3 (0.5%)           | 2 (0.4%)            | 2 (0.4%)  | 0 (0%)             | 0 (0%)              | 0 (0%)    |
| NNRTI      | 108   | I          | 15 (2.7%)          | 10 (1.8%)           | 12 (2.2%) | 3 (0.5%)           | 0 (0%)              | 2 (0.4%)  |
| NNRTI      | 138   | A          | 25 (4.6%)          | 19 (3.5%)           | 18 (3.3%) | 25 (4.6%)          | 20 (3.7%)           | 18 (3.3%) |
| NNRTI      | 138   | G          | 4 (0.7%)           | 3 (0.5%)            | 3 (0.5%)  | 1 (0.2%)           | 0 (0%)              | 0 (0%)    |
| NNRTI      | 138   | K          | 8 (1.5%)           | 4 (0.7%)            | 3 (0.5%)  | 2 (0.4%)           | 1 (0.2%)            | 1 (0.2%)  |
| NNRTI      | 138   | Q          | 1 (0.2%)           | 1 (0.2%)            | 1 (0.2%)  | 0 (0%)             | 0 (0%)              | 0 (0%)    |
| NNRTI      | 138   | R          | 1 (0.2%)           | 1 (0.2%)            | 0 (0%)    | 1 (0.2%)           | 1 (0.2%)            | 1 (0.2%)  |
| NNRTI      | 181   | C          | 14 (2.6%)          | 13 (2.4%)           | 13 (2.4%) | 1 (0.2%)           | 1 (0.2%)            | 1 (0.2%)  |
| NNRTI      | 181   | I          | 0 (0%)             | 0 (0%)              | 0 (0%)    | 0 (0%)             | 0 (0%)              | 0 (0%)    |
| NNRTI      | 181   | V          | 0 (0%)             | 0 (0%)              | 0 (0%)    | 0 (0%)             | 0 (0%)              | 0 (0%)    |
| NNRTI      | 188   | C          | 0 (0%)             | 0 (0%)              | 0 (0%)    | 1 (0.2%)           | 1 (0.2%)            | 1 (0.2%)  |
| NNRTI      | 188   | H          | 2 (0.4%)           | 0 (0%)              | 1 (0.2%)  | 1 (0.2%)           | 0 (0%)              | 0 (0%)    |
| NNRTI      | 188   | L          | 1 (0.2%)           | 1 (0.2%)            | 1 (0.2%)  | 1 (0.2%)           | 1 (0.2%)            | 1 (0.2%)  |
| NNRTI      | 190   | A          | 10 (1.8%)          | 10 (1.8%)           | 10 (1.8%) | 1 (0.2%)           | 0 (0%)              | 0 (0%)    |
| NNRTI      | 190   | S          | 0 (0%)             | 0 (0%)              | 0 (0%)    | 2 (0.4%)           | 2 (0.4%)            | 2 (0.4%)  |
| NNRTI      | 225   | H          | 3 (0.5%)           | 2 (0.4%)            | 2 (0.4%)  | 0 (0%)             | 0 (0%)              | 0 (0%)    |
| NNRTI      | 230   | L          | 2 (0.4%)           | 2 (0.4%)            | 2 (0.4%)  | 0 (0%)             | 0 (0%)              | 0 (0%)    |
| NRTI       | 115   | F          | 1 (0.2%)           | 1 (0.2%)            | 1 (0.2%)  | 3 (0.5%)           | 2 (0.4%)            | 2 (0.4%)  |

| Drug Class | Codon | Amino Acid | Canada (n=546)     |                     |           | UARTO (n=286)      |                     |          |
|------------|-------|------------|--------------------|---------------------|-----------|--------------------|---------------------|----------|
|            |       |            | MiSeq (5% Mixture) | MiSeq (20% Mixture) | Sanger    | MiSeq (5% Mixture) | MiSeq (20% Mixture) | Sanger   |
| NRTI       | 116   | Y          | 0 (0%)             | 0 (0%)              | 0 (0%)    | 0 (0%)             | 0 (0%)              | 0 (0%)   |
| NRTI       | 151   | M          | 0 (0%)             | 0 (0%)              | 0 (0%)    | 0 (0%)             | 0 (0%)              | 0 (0%)   |
| NRTI       | 184   | I          | 15 (2.7%)          | 11 (2%)             | 12 (2.2%) | 3 (0.5%)           | 3 (0.5%)            | 3 (0.5%) |
| NRTI       | 184   | V          | 37 (6.8%)          | 36 (6.6%)           | 38 (7%)   | 6 (1.1%)           | 5 (0.9%)            | 4 (0.7%) |
| NRTI       | 210   | W          | 16 (2.9%)          | 11 (2%)             | 7 (1.3%)  | 1 (0.2%)           | 0 (0%)              | 0 (0%)   |
| NRTI       | 215   | F          | 1 (0.2%)           | 1 (0.2%)            | 2 (0.4%)  | 0 (0%)             | 0 (0%)              | 0 (0%)   |
| NRTI       | 215   | Y          | 9 (1.6%)           | 8 (1.5%)            | 7 (1.3%)  | 0 (0%)             | 0 (0%)              | 0 (0%)   |
| NRTI       | 219   | E          | 4 (0.7%)           | 4 (0.7%)            | 3 (0.5%)  | 2 (0.4%)           | 0 (0%)              | 1 (0.2%) |
| NRTI       | 219   | Q          | 1 (0.2%)           | 1 (0.2%)            | 1 (0.2%)  | 0 (0%)             | 0 (0%)              | 0 (0%)   |

Number and frequency (%) of sequences containing HIV drug resistance mutations as detected by MiSeq and Sanger in n=832 samples successfully sequenced by both methods. Consensus sequences were generated from mapped MiSeq reads with mixed bases called when minority nucleotides were observed in at least 5% (5% Mixture) or 20% (20% Mixture) of sequence reads.



**Table S5: Effect of Read Coverage Levels on Sensitivity and Specificity of MiSeq in Detecting Resistance Mutations Observed by Sanger Sequencing**

| Minimum Coverage<br>(# Reads) | NNRTI       |             | NRTI        |             |
|-------------------------------|-------------|-------------|-------------|-------------|
|                               | Sensitivity | Specificity | Sensitivity | Specificity |
| 0                             | 96.75%      | 98.68%      | 90.91%      | 99.14%      |
| 5                             | 96.75%      | 98.94%      | 90.91%      | 99.14%      |
| 10                            | 96.72%      | 99.33%      | 93.75%      | 99.50%      |
| 15                            | 98.33%      | 99.46%      | 93.75%      | 99.62%      |
| 20                            | 98.33%      | 99.46%      | 93.75%      | 99.62%      |
| 25                            | 98.33%      | 99.45%      | 96.77%      | 99.62%      |
| 30                            | 98.33%      | 99.45%      | 96.77%      | 99.62%      |
| 35                            | 98.33%      | 99.45%      | 96.77%      | 99.62%      |
| 40                            | 98.33%      | 99.45%      | 96.77%      | 99.62%      |
| 45                            | 98.33%      | 99.45%      | 96.77%      | 99.62%      |
| 50                            | 98.32%      | 99.58%      | 96.77%      | 99.61%      |
| 55                            | 98.32%      | 99.58%      | 96.77%      | 99.61%      |
| 60                            | 98.32%      | 99.58%      | 96.77%      | 99.61%      |
| 65                            | 98.32%      | 99.58%      | 96.77%      | 99.61%      |
| 70                            | 98.32%      | 99.58%      | 96.77%      | 99.61%      |
| 75                            | 98.32%      | 99.58%      | 96.77%      | 99.61%      |
| 80                            | 98.32%      | 99.58%      | 96.77%      | 99.61%      |
| 85                            | 98.32%      | 99.58%      | 96.77%      | 99.61%      |
| 90                            | 98.32%      | 99.58%      | 96.77%      | 99.61%      |
| 95                            | 98.32%      | 99.58%      | 96.77%      | 99.61%      |
| 100                           | 98.32%      | 99.58%      | 96.77%      | 99.61%      |
| 105                           | 98.31%      | 99.58%      | 96.72%      | 99.61%      |
| 110                           | 98.31%      | 99.58%      | 96.72%      | 99.61%      |
| 115                           | 98.31%      | 99.58%      | 96.72%      | 99.61%      |
| 120                           | 98.31%      | 99.58%      | 96.72%      | 99.61%      |
| 125                           | 98.31%      | 99.58%      | 96.72%      | 99.61%      |
| 130                           | 98.31%      | 99.58%      | 96.72%      | 99.61%      |
| 135                           | 98.31%      | 99.58%      | 96.72%      | 99.61%      |
| 140                           | 98.31%      | 99.58%      | 96.72%      | 99.61%      |
| 145                           | 98.31%      | 99.58%      | 96.72%      | 99.61%      |

| Minimum Coverage<br>(# Reads) | NNRTI       |             | NRTI        |             |
|-------------------------------|-------------|-------------|-------------|-------------|
|                               | Sensitivity | Specificity | Sensitivity | Specificity |
| 150                           | 98.31%      | 99.58%      | 96.72%      | 99.61%      |
| 160                           | 98.31%      | 99.58%      | 96.72%      | 99.61%      |
| 170                           | 98.31%      | 99.58%      | 96.72%      | 99.61%      |
| 180                           | 98.29%      | 99.58%      | 96.67%      | 99.61%      |
| 190                           | 98.29%      | 99.58%      | 96.67%      | 99.61%      |
| 200                           | 98.29%      | 99.57%      | 96.67%      | 99.61%      |
| 250                           | 98.28%      | 99.57%      | 96.67%      | 99.60%      |
| 300                           | 98.28%      | 99.57%      | 96.67%      | 99.73%      |
| 350                           | 98.26%      | 99.57%      | 96.67%      | 99.87%      |
| 400                           | 98.26%      | 99.57%      | 96.67%      | 99.87%      |
| 450                           | 98.26%      | 99.57%      | 96.67%      | 99.87%      |
| 500                           | 98.25%      | 99.57%      | 96.61%      | 99.87%      |
| 550                           | 98.23%      | 99.56%      | 96.61%      | 99.87%      |
| 600                           | 98.21%      | 99.56%      | 96.61%      | 99.87%      |
| 650                           | 98.21%      | 99.56%      | 96.61%      | 99.86%      |
| 700                           | 98.20%      | 99.56%      | 96.55%      | 99.86%      |
| 750                           | 98.20%      | 99.56%      | 96.55%      | 99.86%      |
| 800                           | 98.20%      | 99.55%      | 96.55%      | 99.86%      |
| 850                           | 98.20%      | 99.55%      | 96.55%      | 99.86%      |
| 900                           | 98.20%      | 99.55%      | 96.55%      | 99.86%      |
| 950                           | 98.18%      | 99.55%      | 96.55%      | 99.86%      |
| 1000                          | 98.18%      | 99.54%      | 96.55%      | 99.86%      |

Nucleotide mixtures were called when minority bases were observed in at least 20% of MiSeq sequence reads.

**Figure S1: Sanger and MiSeq Sequencing Success Rate Stratified by Plasma Viral Load and Cohort**

Overall, 881 (80%) and 892 (81%) clinical samples were successfully sequenced by the Sanger and MiSeq methods, respectively, with 832 (75%) having sequences from both methods. Sequencing failure rate was driven largely by sample pVL without any obvious amplification bias in either cohort. Numbers above bars represent the total number of samples tested in each pVL category for each cohort.

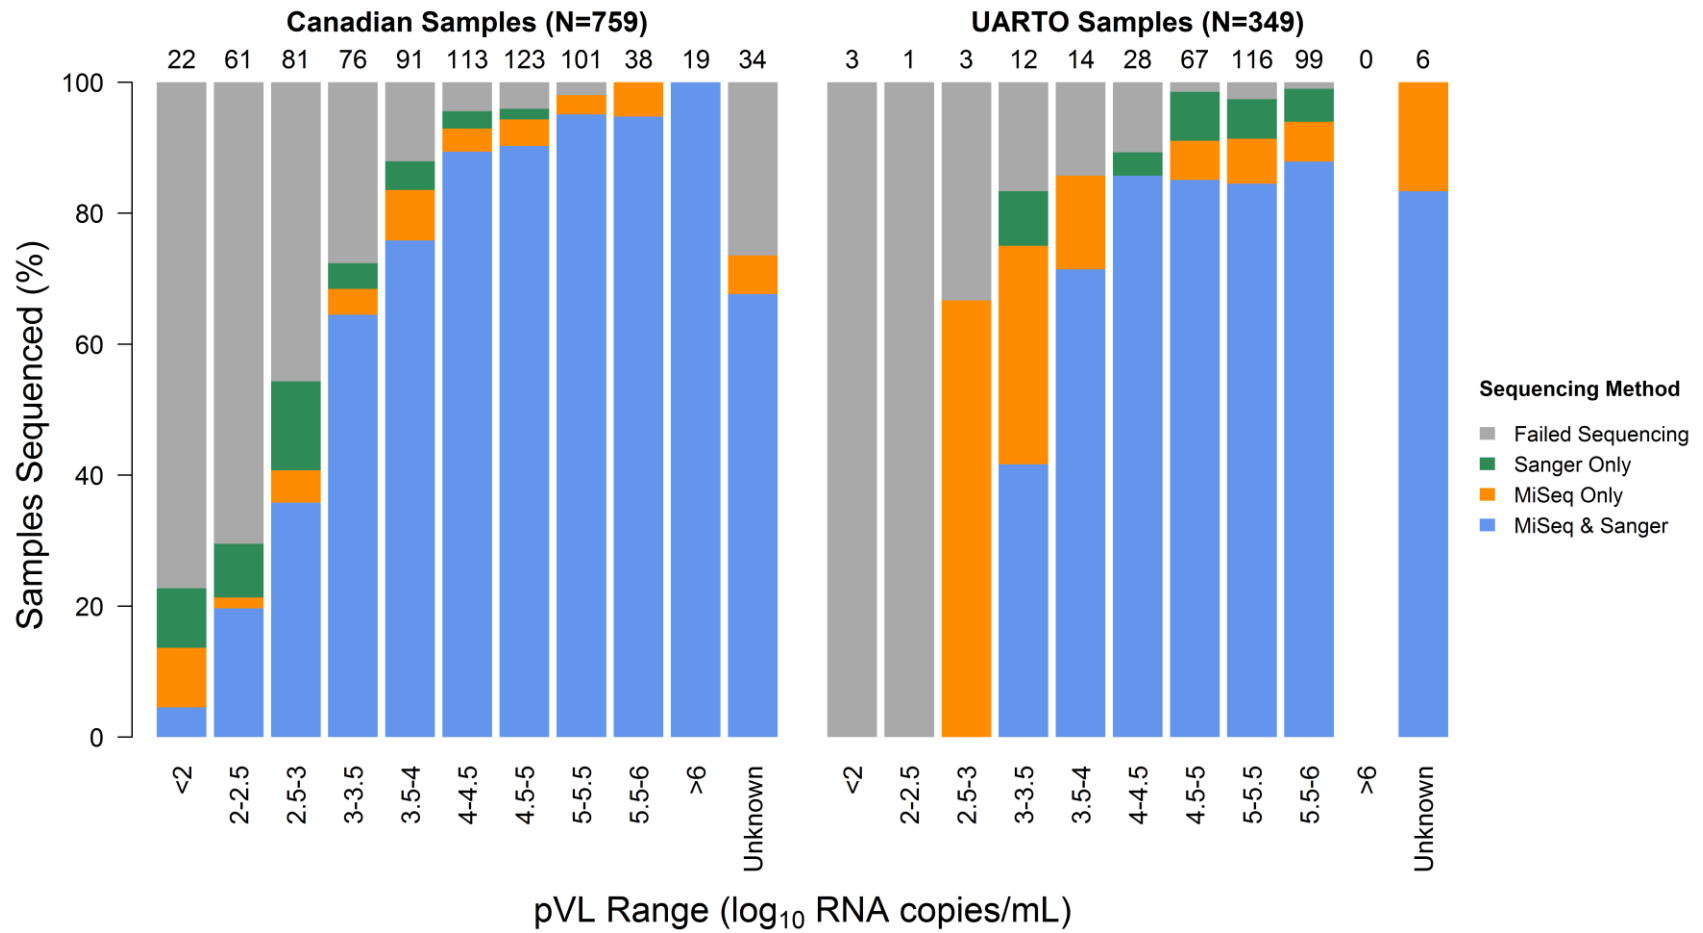

**Figure S2: Proportion of Samples with Detectable Resistance Mutations with Varying Mixture Calling Thresholds**

Drug resistance interpretations of clinical samples (N=832) successfully sequenced by Sanger and MiSeq methods. Orange and blue bars represent the proportion of samples with observed NNRTI and NRTI resistance ( $\geq 1$  mutation) from MiSeq analysis. The dashed and dotted lines represent the results from Sanger analysis for NNRTI and NRTI resistance, respectively. The effect of varying the MiSeq nucleotide mixture calling threshold suggests that the sequence coverage obtained may be sufficient to identify lower-frequency resistance mutations.

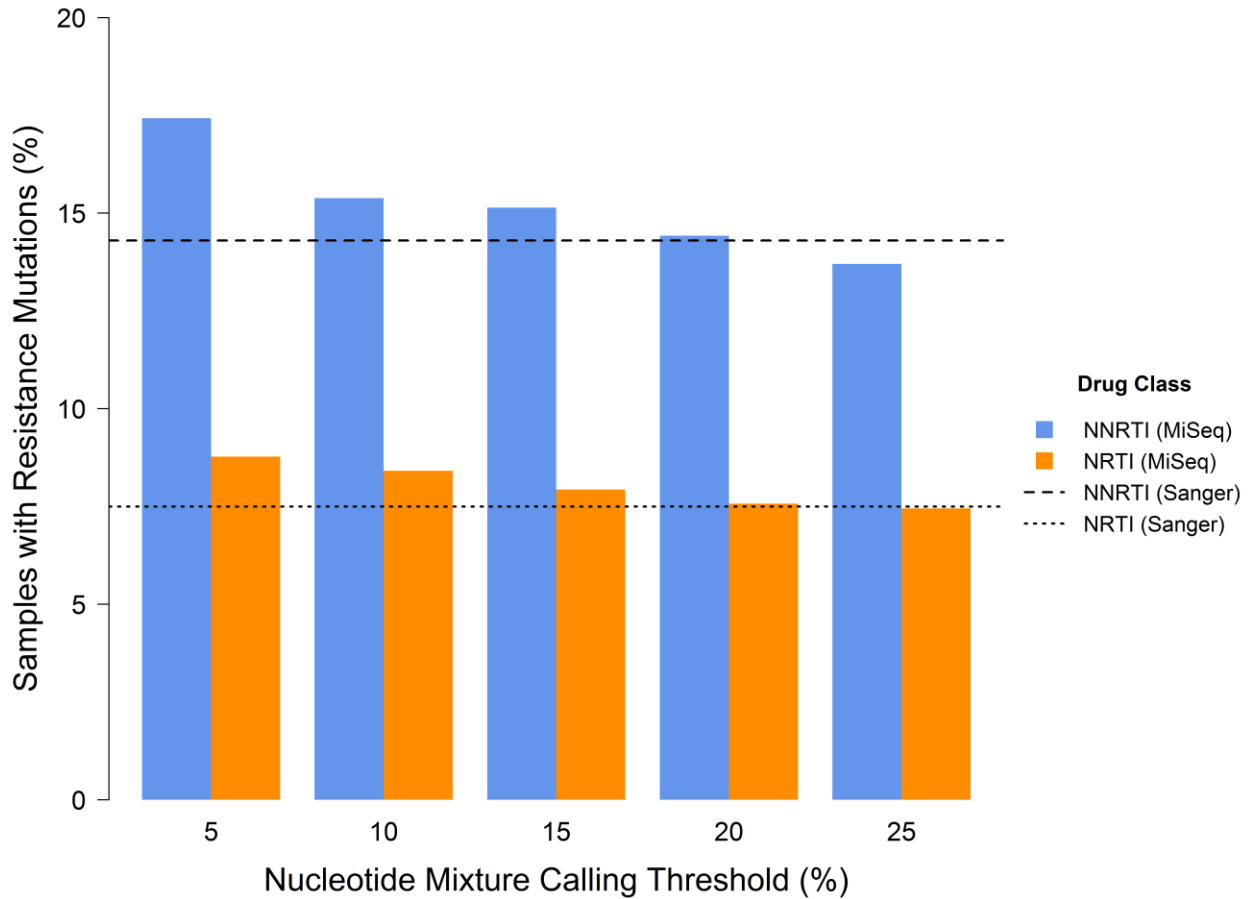

**Figure S3: Sanger and MiSeq Nucleotide Sequence Concordance Stratified by Plasma Viral Load and Cohort**

Sequence concordance between Sanger and MiSeq sequencing was high across all viral load strata regardless of the sample country of origin. Outliers beyond 1.5 IQR of the box hinge, represented by dots, are due largely to high numbers of mixed base calls in selected MiSeq sequences. Clinical samples without viral load data (“Unknown”) were also successfully sequenced by both methods and yielded generally concordant results. Numbers above boxes represent the total number of successfully sequenced by both methods in each pVL category for each cohort.

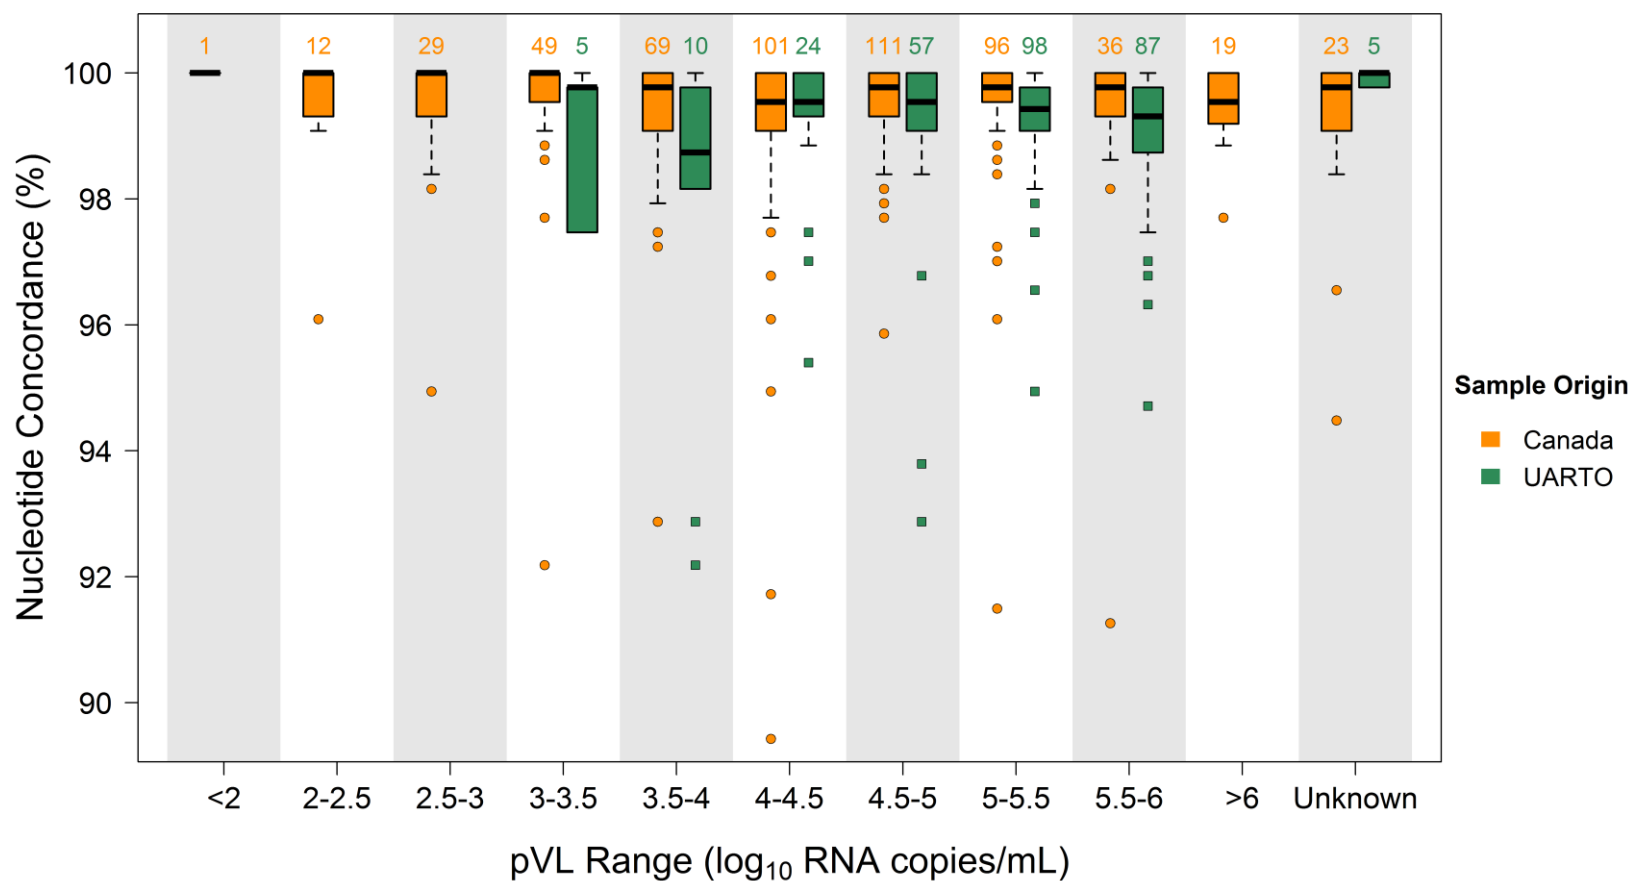

Supplement: AAC.01490-15_zac011154507so1.pdf [file AAC.01490-15_zac011154507so1.pdf]
